# Supplementary material for: Metrics of hurricane-ocean interaction: vertically-integrated or vertically-averaged ocean temperature?
Source: Copernicus journal article supplement (doi:10.5194/os-5-351-2009), 2009-09-18
Supplement: Supplementary file 1 [file os-5-351-2009-supplement.zip]

# A comparison of $T_d$ with 3D-PWP numerical model solutions

supplementary material for Price (2009), *Ocean Science*

James F. Price

Woods Hole Oceanographic Institution, Woods Hole, Massachusetts 02543  
jprice@whoi.edu <http://www.whoi.edu/science/PO/people/jprice>

September 9, 2009

---

The  $T_d$  metric depends upon ocean parameters (arbitrary temperature and salinity profiles) and the parameters of an idealized, translating vortex model of a hurricane wind field. Most apposite the theme of Price (2009) is dependence upon the former. However, in applications it may prove necessary to vary the hurricane parameters away from the category 3 values assumed, since the depth of vertical mixing and thus  $T_d$  will clearly depend upon hurricane intensity, among others. The first aim of this supplementary note is to explore the dependence of  $T_d$  upon both ocean and hurricane parameters, and to compare the results with solutions from a 3-D numerical ocean model. A second aim is to expose several limitations that are inherent in the simplified and somewhat ad hoc formulation of especially the wind-driven current required by  $T_d$ . In brief:  $T_d$  works well insofar as SST cooling alone is concerned, though with some reservations about the mechanism at low hurricane translation speeds.  $T_d$  does not give useful results for subsurface ocean variables, e.g., mixed-layer depth.

**Method:** Groundtruth for this comparison was generated by solving repeatedly the 3D-PWP numerical ocean model (Price et al., 1994). A base case was defined as initial SST = 29 °C, initial ML depth  $d_i = 30$  m, and stratification of  $\partial T/\partial z = 0.05^\circ\text{C m}^{-1}$  and uniform down to 200 m; salinity was assumed vertically uniform and held constant. For the present purpose the initial ocean temperature profile may then be represented by just two parameters,  $d_i$  and  $\partial T/\partial z$ . The latitude was set to 22°, and the hurricane was defined to mimic Hurricane Frances (2004): a steadily translating cyclonic wind vortex (see Zedler et al., 2009) with translation speed  $U_h = 5.5 \text{ m s}^{-1}$ , a radius to maximum winds  $R_h = 35$  km, and maximum wind stress  $\tau = 5.5 \text{ Pa}$  (estimated from wind as in Sanford et al., 2007). In a sequence of numerical experiments, one of the four parameters —  $d_i$ ,  $\partial T/\partial z$ ,  $U_h$  or  $\tau$  — was varied over a significant range around the base value. The maximum cooling of SST was

extracted from each numerical solution and the ensemble of numerical model results then compared with the cooling predicted by the  $T_d$  metric (Fig. 1). The corresponding mixing (mixed-layer) depth  $d$  from the  $T_d$  metric is in Fig. 2, but without the corresponding 3D-PWP mixed-layer depth (discussed further below).

**Results:** The variation of  $T_d$  with these external parameters is close to that found in the 3D-PWP numerical solutions over the extensive parameter space explored here (Fig. 1). In that regard,  $T_d$  appears to be empirically adequate, but keep in mind that 'empirical' here refers to agreement with another, albeit much more comprehensive ocean model, and not to agreement with field observations. In the case of the variation with  $d_i$ ,  $\partial T/\partial z$  and  $\tau$ , we can go a step further and say that  $T_d$  varies with these parameters for the same reason that the 3D-PWP numerical model solution varies with these parameters, i.e.,  $T_d$  arrives at the right answer for the right reason.

**Non-local dynamics at low translation speed:** Interestingly, this is not true for the dependence of cooling upon translation speed in the range of low translation speeds,  $U_h \leq 3 \text{ m s}^{-1}$  (Fig. 1, lower right) where the  $T_d$  metric gets to the right answer by a fortuitous cancellation of errors. A telltale sign that something is amiss is apparent in the predicted mixing depth (Fig. 2, lower right), which is excessive at low translation speeds.

The  $T_d$  metric is, in effect, a one-dimensional (local) mixed-layer model. It ignores advection of all kinds, including vertical advection, which becomes significant at low translation speeds, roughly  $U_h \leq 3 \text{ m s}^{-1}$  and very important for translation speeds of about  $1 \text{ m s}^{-1}$  (Yablonski and Ginis, 2008; Lin et al., 2009). At such a low but plausible translation speed, large amplitude upward advection (upwelling) occurs during the hurricane passage. This causes the upper ocean to be compressed at the same time that intense diapycnal mixing causes the surface layer to thicken by entrainment. The net result is significantly enhanced diapycnal mixing and surface layer cooling. This compression effect is not represented in the  $T_d$  metric, and yet the predicted cooling is satisfactory at low translation speeds because the wind-driven current is systematically overestimated at low translation speed. This compensating error arises because the acceleration time scale for the wind stress is presumed to be the residence time of the hurricane, and thus inversely proportional to translation speed. The combined effect of Earth's rotation and the turning of the hurricane wind stress are accounted for only by the ad hoc expedient of a similarity (or scaling) constant,  $S$  (Price, 2009, Section 2.2.2). The assumption of a constant  $S$  leads to an overestimate of the wind-driven current at low translation speeds which is just enough to compensate for the missing compression effect of vertical advection.

At low translation speeds the location of the maximum cooling found in the 3D-PWP numerical solutions shifts closer the track and closer to the hurricane eye (Price, 1981; Yablonski and Ginis, 2008). The areal extent of the cooling increases as well. This second aspect of the SST cooling response may have a significant impact upon hurricane-ocean interaction at low translations speeds (Wu et al., 2005; Lin et al., 2009) and could be treated by a future metric, if it is desirable.

**Mixing depth and mixed-layer depth:** In the main text the emphasis was at first upon the depth of vertical mixing,  $d$ , or mixed-layer depth. Mixed-layer depth is a familiar and seemingly simple variable, but one that may not always serve well for the description of field observations or highly resolved numerical solutions. Specifically, the appropriate value of  $d$  estimated by the  $T_d$  metric is and should be somewhat greater than the depth of the surface mixed-layer that is observed in field data and in the 3D-PWP model solutions (Figs. 2 and 3). A systematic difference arises because the actual surface mixed layer is not bounded below by a density jump, as a conventional, bulk mixed-layer model such as  $T_d$  presumes, but rather by a sheared and stratified transition layer that is O(75) m thick during the hurricane passage (Price et al., 1994; Sanford et al., 2009). The transition layer extends more or less symmetrically into the (quasi-) mixed-layer above and into the stratified fluid below. The thickness of the mixed-layer observed in field data or 3D-PWP model data is thus considerably less than the depth of the mixed-layer depth estimated by the  $T_d$  metric, even while the amplitude of vertical mixing, as evinced by sea surface cooling, may be closely comparable.

**Summary and remarks:** The  $T_d$  metric effectively reproduces the maximum SST cooling found in the 3D-PWP numerical solutions and to that extent it meets a main requirement of a hurricane-ocean forecasting metric. On the other hand, it does not reproduce subsurface ocean variables that could be of importance in other contexts. The thickness of the surface mixed-layer,  $d$ , is systematically greater than is the mixed-layer computed in a highly resolved numerical solution (Fig. 3) because the  $T_d$  metric is a conventional, bulk mixed-layer model. The thermocline-depth response is missing altogether because  $T_d$  is local (one-dimensional) and so vertical advection and pressure gradients are omitted. Finally, the wind-driven current is overestimated at low hurricane translation speeds because the effects of wind and current rotation are not treated explicitly. The prediction of a realistic subsurface ocean response requires either a very different metric, or perhaps better left to a three-dimensional numerical ocean model.

## References

- Lin, I.-I., I.-F. Pun, and C.-C. Wu, 'Upper Ocean Thermal Structure and the Western North Pacific Category-5 Typhoons Part II: Dependence on Translation Speed', *Mon. Wea. Rev.*, in press, 2009.
- Price, J. F., 'Upper ocean response to a hurricane', *J. Phys. Oceanogr.*, **11**, 153-175, 1981.
- Price, J. F., T. B. Sanford, and G. Z. Forristall, 'Forced stage response to a moving hurricane'. *J. Phys. Oceanogr.*, **24**(2), 233-260, 1994.

Price, J. F., 'Metrics of hurricane-ocean interaction: Vertically-averaged or vertically-integrated ocean temperature?' *Ocean Sci.*, in press, 2009.

Sanford, T. B., J. F. Price and J. B. Girton. ' Upper Ocean Response to Hurricane Frances (2004) Observed by Profiling EM-APEX Floats', *J. Phys. Oceanogr.* , submitted 2009.

Yablonski, R., and I. Ginis, 'Limitation of one-dimensional ocean models for coupled hurricane-ocean model forecasts', *Mon. Wea. Rev.*, submitted, 2008.

Wu, L. , B. Wang and S. A. Braun, 'Impacts of air-sea interaction on tropical cyclone track and intensity', *Mon. Wea. Rev.*, **133**, 3299-3314, 2005.

Zedler, S. E., P. P. Niiler, D. Stammer, E. Terrill, and J. Morzel, 'Oceans response to Hurricane Frances and its implications for drag coefficient parameterization at high wind speeds', *J. Geophys. Res. Oceans*, doi:10.1029/2008JC005205, 2009.

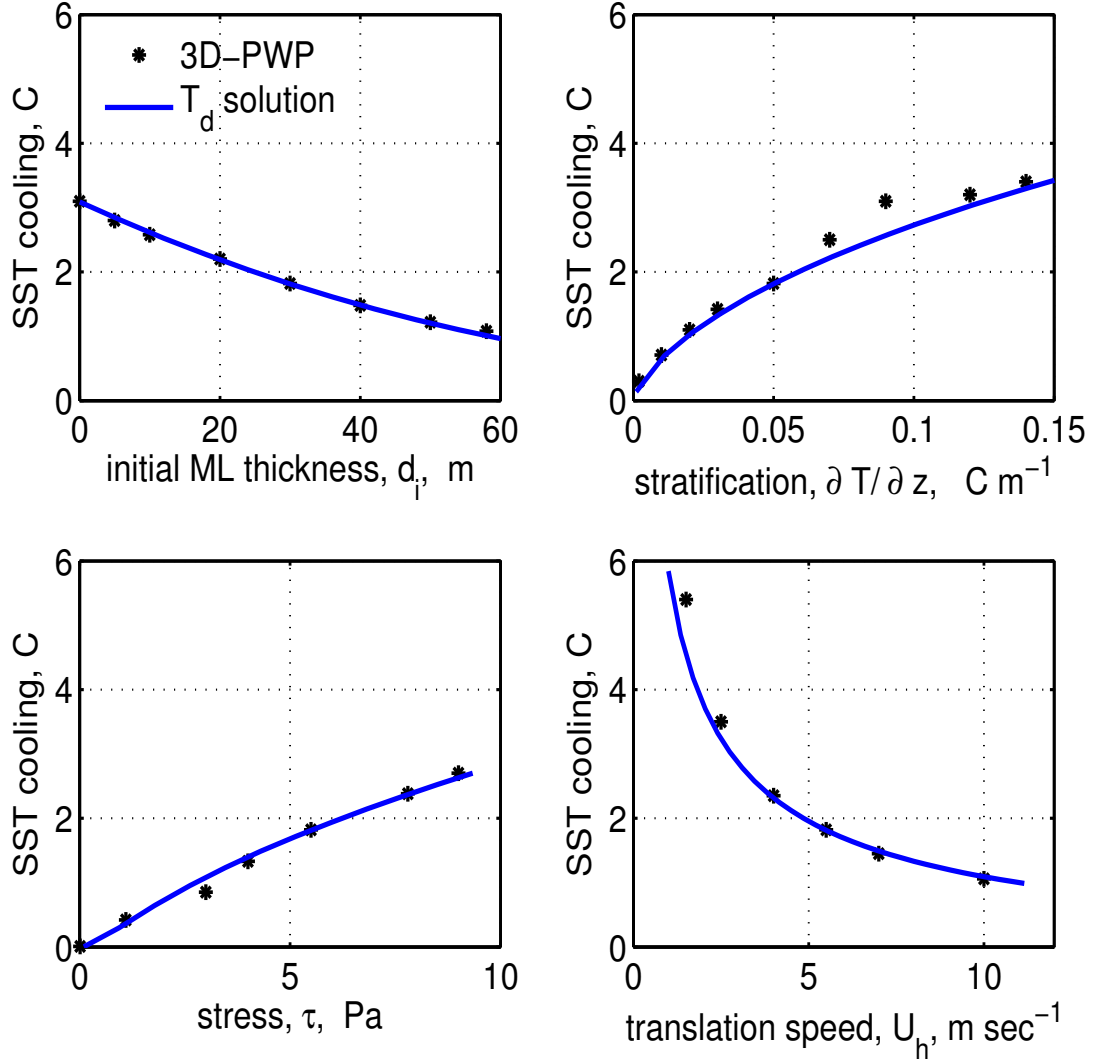

Figure 1: The maximum cooling as a function of initial mixed-layer (ML) thickness (upper left), stratification (upper right), maximum hurricane wind stress (lower left) and hurricane translation speed (lower right). The asterisks are the maximum cooling extracted from a 3D-PWP model solution (one point per solution) and the solid blue lines are the continuous dependence evaluated from the  $T_d$  metric. The comparison is generally favorable, though as discussed in the text, the  $T_d$  metric misrepresents the dynamics at low translation speeds.

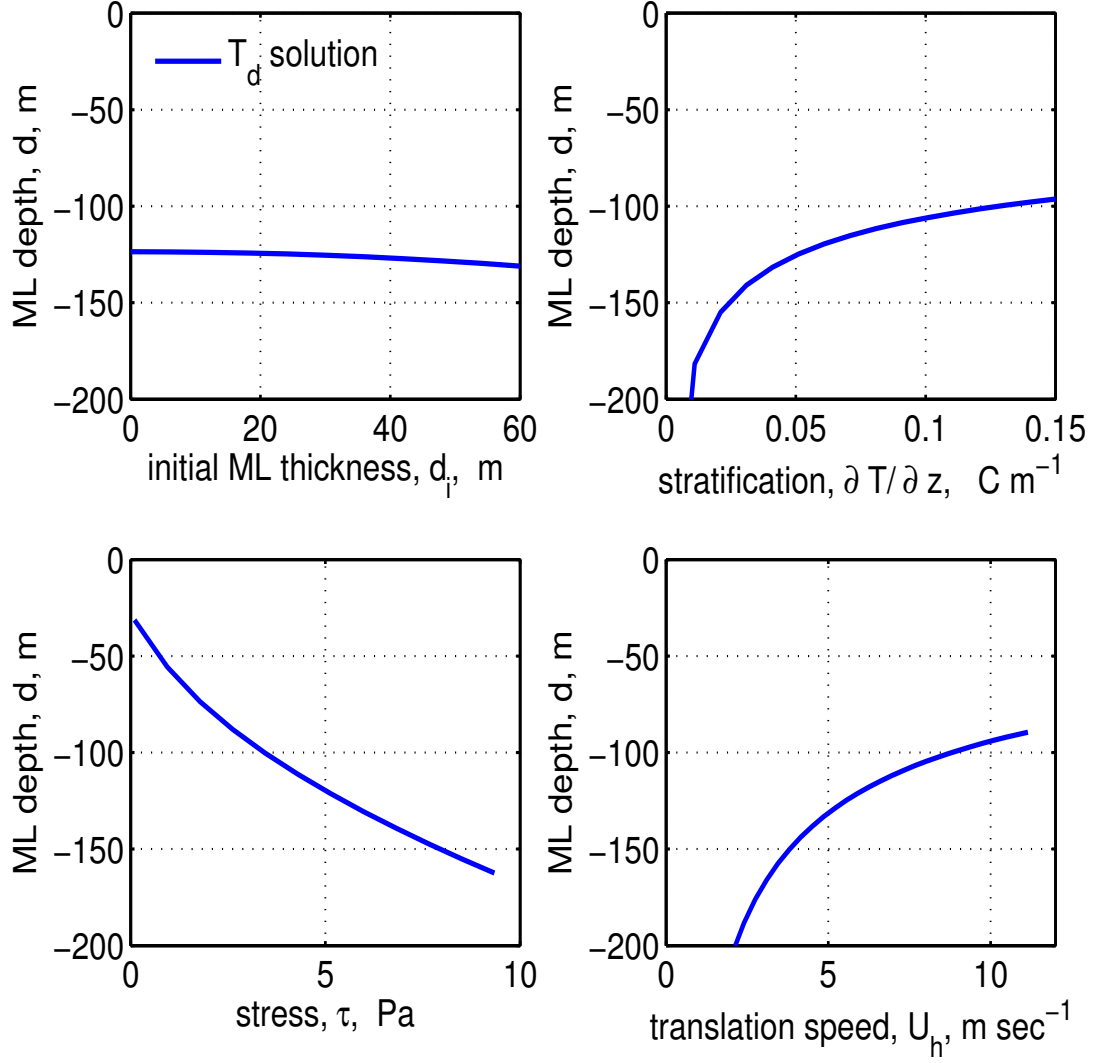

Figure 2: The variation of mixing depth,  $d$ , with initial ML thickness (upper left), stratification (upper right), maximum hurricane wind stress (lower left) and hurricane translation speed (lower right). The solid blue lines are from the  $T_d$  metric. A corresponding mixing depth is not shown for the 3D-PWP model solutions.

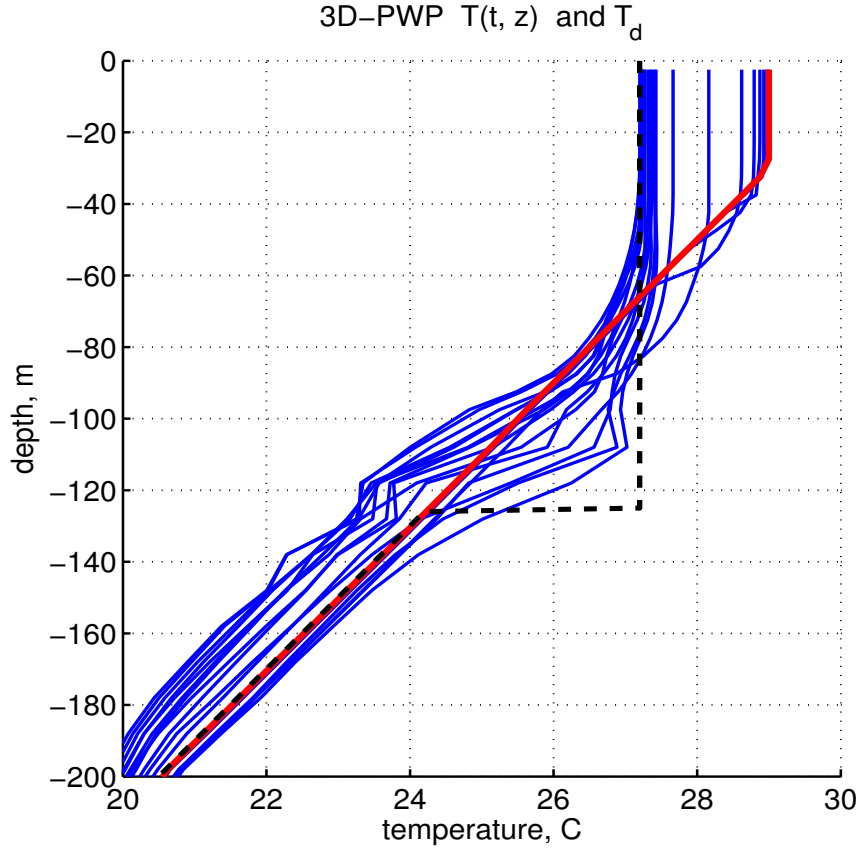

Figure 3: Temperature profiles from the 3D-PWP numerical model (the family of blue lines) and as estimated by the  $T_d$  metric (the single, heavy dashed line). The initial temperature profile is in red and is the base case around which the numerical experiments were pivoted. The numerical solution was sampled at  $x = 55$  km to the right of the track, and for one day before and two days after the hurricane passage. The upwelling of about 25 m amplitude evident in the upper thermocline occurred mainly after the most intense diapycnal mixing had been completed and did not enhance the SST cooling strongly in this experiment. The 10 - 20 m thick regions of low vertical gradient in the transition layer (depths of 100 - 140 m) are associated with shear flow instability that is parameterized by a critical gradient Richardson number condition.
